***dnmt1* function is required to maintain retinal stem cells within the ciliary marginal zone of the zebrafish eye**

Krista M. Angileri<sup>1</sup> and Jeffrey M. Gross<sup>1,2\*</sup>

<sup>1</sup>: Department of Ophthalmology, Louis J. Fox Center for Vision Restoration, University of Pittsburgh School of Medicine, Pittsburgh, PA

<sup>2</sup>: Department of Developmental Biology, University of Pittsburgh School of Medicine, Pittsburgh, PA

**\*Corresponding author:** Jeffrey M. Gross, Department of Ophthalmology, Louis J. Fox Center for Vision Restoration, University of Pittsburgh School of Medicine, Pittsburgh PA, 15213, USA; [grossjm@pitt.edu](mailto:grossjm@pitt.edu)

# **Abstract:**

The ciliary marginal zone (CMZ) of the zebrafish retina contains a population of actively proliferating resident stem cells, which generate retinal neurons throughout life. The maintenance methyltransferase, *dnmt1*, is expressed within the CMZ. Loss of *dnmt1* function results in gene misregulation and cell death in a variety of developmental contexts, however, its role in retinal stem cell (RSC) maintenance is currently unknown. Here, we demonstrate that zebrafish *dnmt1*<sup>s872</sup> mutants possess severe defects in RSC maintenance within the CMZ. Using a combination of immunohistochemistry, *in situ* hybridization, and a transgenic reporter assay, our results demonstrate a requirement for *dnmt1* activity in the regulation of RSC proliferation, gene expression and in the repression of endogenous retroelements (REs). Ultimately, cell death is elevated in the *dnmt1*<sup>-/-</sup> CMZ, but in a *p53*-independent manner. Using a transgenic reporter for RE transposition activity, we demonstrate increased transposition in the *dnmt1*<sup>-/-</sup> CMZ. Taken together our data identify a critical role for *dnmt1* function in RSC maintenance in the vertebrate eye.

## Introduction:

The distal region of the vertebrate retina, termed the ciliary marginal zone (CMZ), contains a population of resident retinal stem cells (RSCs). The CMZ remains proliferative throughout the life of fish, but it proliferates to a more limited extent during the lifetime of amphibians and birds<sup>1–6</sup>. Whether an analogous structure exists in mammals is debated, but there are distinct, progenitor-like cells in the periphery of the retina that are active during embryogenesis<sup>7–9</sup>. Mammalian RSCs can also be isolated from the adult ciliary margin, cultured *in vitro*, and stimulated to produce retinal neurons<sup>10–13</sup>. However, this activity has not been demonstrated in the mature mammalian retinae *in vivo*.

Studies of the CMZ have primarily focused on zebrafish and *Xenopus* models to determine genetic pathways required for RSC identity<sup>2,14–16</sup> and to characterize the epigenetic networks which regulate RSC function<sup>17,18</sup>. By comparison, the mechanisms mediating RSC maintenance *in vivo* remain unknown. In studies of RSCs, the zebrafish has been advantageous given that it possesses a highly active RSC population and is tractable for genetic and pharmacological manipulations, transgenesis and *in vivo* imaging<sup>19,20</sup>.

DNA methylation, a frequently studied epigenetic modification, is the process through which a methyl group is added to the fifth carbon of cytosine nucleotides and is commonly found at CpG dinucleotide sequences<sup>21</sup>. Members of the family of DNA methyltransferase (Dnmt) enzymes<sup>22,23</sup> catalyze this epigenetic modification. Dnmt1 serves as a maintenance methyltransferase, copying the methylation pattern from parent to daughter strand during DNA replication and its function is required for cell cycle progression<sup>24–26</sup>. Loss of Dnmt1 function results in genomic hypomethylation<sup>27–29</sup> and in developmental contexts and specific organ systems, this often compromises progenitor cell maintenance<sup>24,27,30–33</sup> through numerous cellular mechanisms. These include: inducing cell cycle arrest<sup>34,35</sup>, retroelement activation<sup>36–39</sup>, inflammatory responses<sup>33,37,40</sup>, aberrant differentiation<sup>28,31,41–44</sup> and/or p53-mediated apoptosis<sup>34,35</sup>.

Utilizing the *dnmt1*<sup>s872</sup> mutant zebrafish allele<sup>30</sup>, we establish an *in vivo* requirement for dnmt1 in RSCs. Through our analyses, we identify a decrease in overall RSC numbers, reduced RSC proliferation and aberrant gene expression patterns within the dnmt1-deficient CMZ. Additionally, we note increased retroelement expression and increased retrotransposition activity in *dnmt1*<sup>-/-</sup> embryos. Remarkably, RSCs in *dnmt1*<sup>-/-</sup> embryos are eliminated in a p53-

independent manner, suggesting that dnmt1 represses alternative, non-apoptotic cell death pathways in RSCs. Taken together, these data highlight a novel function for dnmt1 in maintaining stem cell populations in the vertebrate retina.

## Results:

### ***dnmt1* mutants possess defects in the ciliary marginal zone.**

Previously, we identified a requirement for *dnmt1* in maintaining lens epithelial cell viability using *dnmt1*<sup>s872</sup> mutant zebrafish<sup>27</sup>. During these previous studies, we also detected photoreceptor layer abnormalities, similar to those documented in *Dnmt1*<sup>-/-</sup> conditional knockout mice<sup>45,46</sup>, and an apparent defect in the CMZ. With an interest in the role that *dnmt1* plays in maintaining RSCs *in vivo*, here, we focused further on the CMZ phenotype. Using DAPI to label and count retinal nuclei, we confirmed a progressive degeneration of CMZ morphology beginning at 4 days post fertilization (dpf; Figure 1A-F) and a significant decline in retinal cell numbers through 5dpf (Figure 1G). The total number of cells present within central retina sections are equivalent between *dnmt1*<sup>-/-</sup> and sibling larvae at 3dpf; however, numbers in *dnmt1*<sup>-/-</sup> larvae diminish significantly between 4 and 5dpf (18.8% and 26.6% reduction respectively;  $p < 0.0005$ ; Figure 1G). Additionally, we compared the proportions of nuclei within the ganglion cell layer (GCL), inner nuclear layer (INL), outer nuclear layer (ONL), and CMZ between *dnmt1*<sup>-/-</sup> larvae and siblings from 3-5dpf (Figure 1H). Interestingly, the proportions of cells in all three retinal laminae (GCL, INL, & ONL) remained equivalent over time in *dnmt1*<sup>-/-</sup> larvae when compared to siblings, with only a slight increase in the ONL at 4dpf (Figure 1H and Supplementary Figure 1A-C;  $p < 0.005$ ). In contrast, the CMZ proportion decreased significantly from 3-5dpf suggesting that *dnmt1* function in the retina is required within the CMZ to maintain the RSC population (Figure 1H and Supplementary Figure 1D;  $p < 0.0005$ ).

### **Cell death is elevated in the *dnmt1*<sup>-/-</sup> CMZ in a *p53*-independent manner.**

Previous publications have demonstrated increased *p53* expression and TUNEL<sup>+</sup> cells in *Dnmt1*-deficient tissues and cell types<sup>30,34,35,47</sup> suggesting a *p53*-dependent apoptotic mechanism for cell loss. Based on these studies, we hypothesized that *dnmt1*<sup>-/-</sup> RSCs would similarly undergo *p53*-dependent apoptosis. To test this hypothesis, we first assayed for the presence of DNA double-strand breaks in *dnmt1*<sup>-/-</sup> and sibling retinæ using TUNEL (Figure 2A-F). *dnmt1* siblings displayed few TUNEL<sup>+</sup> cells between 3-5dpf (Figure 2L-N), whereas the *dnmt1*<sup>-/-</sup> retina contained increased proportions of TUNEL<sup>+</sup> cells at 3, 4, and 5dpf in the INL (+0.5-2.3%,  $p < 0.05$ ), ONL (+0.01-1.8%,  $p < 0.05$ ) and at 5dpf in the GCL (+1.3%,  $p < 0.05$ ; Figure 2H-I). Within the CMZ, we detected a 4.5% increase in TUNEL<sup>+</sup> cells at 3dpf ( $p < 0.005$ , Figure 2J) prior to the onset

of CMZ disorganization. This proportion decreased to 1% at 4dpf ( $p < 0.05$ ) and increased again to 3.7% at 5dpf ( $p < 0.05$ ; Figure 2J), a time at which *dnmt1*<sup>-/-</sup> larvae begin to display severe systemic defects. During this 3-5dpf period, the majority of TUNEL<sup>+</sup> cells in *dnmt1*<sup>-/-</sup> larvae were located within the retina proper, not within the CMZ (Figure 2K and Supplemental Fig S2). In concordance with the TUNEL data, immunofluorescence of the pro-apoptotic marker, active-caspase3, displayed similar patterns to TUNEL (data not shown). Together, these data are consistent with those seen in previous studies; *dnmt1* deficiency results in increased cell death<sup>30,35,47</sup>.

To identify if *dnmt1* deficient RSCs are lost via *p53*-dependent apoptosis, we generated *dnmt1*;*p53* double mutants using the *p53*<sup>zdf1</sup> allele, which is defective in *p53*-dependent apoptosis<sup>48,49</sup>. We hypothesized that *p53*-dependent apoptosis was the driving mechanism of RSC loss in *dnmt1*<sup>-/-</sup> mutants and therefore loss of *p53* activity would rescue the CMZ phenotype. To test this hypothesis, we quantified nuclei in *dnmt1*<sup>+/+</sup>;*p53*<sup>+/+</sup>, *dnmt1*<sup>+/+</sup>;*p53*<sup>-/-</sup>, *dnmt1*<sup>-/-</sup>;*p53*<sup>+/+</sup> and *dnmt1*<sup>-/-</sup>;*p53*<sup>-/-</sup> retinæ (Figure 3). Loss of *p53* function did not affect retinal morphology (Figure 3A,E,I compared to Figure 3B,F,J) and *dnmt1*<sup>+/+</sup>;*p53*<sup>-/-</sup> mutants possessed equivalent retinal cell numbers as *dnmt1*<sup>+/+</sup>;*p53*<sup>+/+</sup> siblings (Figure 3Q-T and Supplemental Fig S2D) at 3,4 and 5dpf. When considering *dnmt1*<sup>-/-</sup>;*p53*<sup>-/-</sup> larvae, we predicted an increase in CMZ cell numbers and a rescue of the CMZ-specific phenotype when compared to *dnmt1*<sup>-/-</sup>;*p53*<sup>+/+</sup> larvae. Surprisingly, the *dnmt1*<sup>-/-</sup>;*p53*<sup>-/-</sup> CMZ displayed similar morphology (Figure 3C,D,G,H,K,L) and was proportional to the *dnmt1*<sup>-/-</sup>;*p53*<sup>+/+</sup> sibling retina (Figure 3P) across all three time points. These results suggest that *p53*-dependent apoptosis is not responsible for *dnmt1*<sup>-/-</sup> RSC loss.

### ***dnmt1* is required to maintain RSC gene expression.**

*dnmt1* is expressed in RSCs at 4dpf (Figure 4I,J), consistent with *dnmt1*'s known requirements in stem cell populations *in vivo*<sup>27,30,31,50,51</sup>. Loss of *Dnmt1* function results in aberrant gene expression in a number of contexts<sup>45,50,52,53</sup> and therefore we wanted to determine if CMZ-specific gene expression was altered in the *dnmt1*<sup>-/-</sup> CMZ. Previous reports have characterized the expression/distribution of the CMZ-specific genes: *col15a1b*, *cyclinD1*, *cdkn1c*, and *atoh7*<sup>14,15,54</sup>. To determine if CMZ expression of these genes was altered in *dnmt1*<sup>-/-</sup> larvae, we utilized whole-mount *in situ* hybridization at 4dpf when the morphological defects in the CMZ begin to manifest (Figure 1). All sibling controls displayed normal CMZ-

specific gene expression at 4dpf (Figure 4). Expression of *col15a1b* and *atoh7* were normal in *dnmt1*<sup>-/-</sup> larvae (Figure 4C,D,S,T); however, the expression of *ccnD1* and *cdkn1ca*, which function to regulate cell cycle progression, were disrupted (Figure 4G,H,O,P). The majority of 4dpf *dnmt1*<sup>-/-</sup> CMZs maintained *dnmt1* expression (Figure 4K,L). These data suggest that RSCs are present at the onset of morphological defects in the *dnmt1*<sup>-/-</sup> CMZ, but could be impaired in their ability to progress through the cell cycle and self-renew.

### **Loss of *dnmt1* activity results in decreased RSC proliferation.**

RSCs within the teleost CMZ remain proliferative throughout the lifespan of the animal<sup>3,55,56</sup> and Dnmt1 is known to be required for cell cycle progression within stem cells of various tissue types<sup>24,25,57</sup>. Based on the significant loss of RSCs in *dnmt1*<sup>-/-</sup> larvae between 3-5dpf (Figure 1) and the inability of *dnmt1*<sup>-/-</sup> RSCs to maintain expression of cell cycle genes (Figure 4), we hypothesized that *dnmt1*<sup>-/-</sup> RSCs would be defective in their proliferative capacity. To test this hypothesis, larvae were incubated for 2 hours in BrdU at 3, 4, and 5dpf, fixed immediately thereafter, and immunolabeled for BrdU and phosphohistone-H3-serine10 (pH3) to identify RSCs in late G2/M. *dnmt1* siblings maintained a constant proportion of BrdU<sup>+</sup> cells within the CMZ between 3-5dpf (Figure 5A-C,H). Notably, the proportion of BrdU<sup>+</sup> *dnmt1*<sup>-/-</sup> RSCs at 3dpf was comparable to sibling controls (compare images in Figure 5A and 5D and nuclear proportions in Figure 5G). However, beginning at 4dpf, the percentage of BrdU<sup>+</sup> *dnmt1*<sup>-/-</sup> RSCs is significantly reduced when compared to controls (Figure 5B,E,H; *p* < 0.00001), and this proportion continues to decrease through 5dpf (Figure 5C,F,H; *p* < 0.00001). Additionally, the proportion of cells in late G2/M phase (pH3<sup>+</sup>) was significantly reduced at 3 and 4dpf in the *dnmt1*<sup>-/-</sup> CMZ when compared to siblings (Figure 5G,I) indicating potential cell cycle defects in *dnmt1*<sup>-/-</sup> RSCs that manifest as early as 3dpf.

### ***dnmt1* is required for RSC differentiation and incorporation into the neural retina.**

Potential cell cycle progression defects coupled to the fact that the vast majority of *dnmt1*<sup>-/-</sup> RSCs elude *p53*-dependent apoptosis (Figures 2 & 3) led us to hypothesize that *dnmt1*<sup>-/-</sup> RSCs might instead be undergoing premature differentiation, as has been shown *in vitro*<sup>28</sup>. To test this hypothesis, we performed a BrdU birth-dating assay<sup>58</sup>. Our aim was to saturate RSCs with BrdU for a 12-hour period (3-3.5dpf) and quantify the average starting number of proliferating cells at 3.5dpf

and determine the final position of daughter cells at 5dpf, once they incorporated into the retina (Figure 6A). Initial analysis of these samples revealed that most BrdU<sup>+</sup> nuclei in both sibling and *dnmt1*<sup>-/-</sup> larvae were located within the CMZ after the 12hr incubation (Figure 6C,E,G). However, there were a few BrdU<sup>+</sup> cells that had incorporated into the neural retina at this time (Figure 6G). By comparing the number of BrdU<sup>+</sup> nuclei of each retinal domain (CMZ, GCL, INL, ONL, Figure 6B) to the total number of BrdU<sup>+</sup> nuclei (Figure 6H) at 3.5dpf, we noted a significant increase in the proportion of BrdU<sup>+</sup> nuclei in the *dnmt1*<sup>-/-</sup> CMZ (79.5%,  $p < 0.05$ ) compared to controls (71.7%, Figure 6G; Supplemental Fig. S3A). Additionally, we found that the proportion of BrdU<sup>+</sup> cells in the *dnmt1*<sup>-/-</sup> ONL (7.8%,  $p < 0.05$ ) was significantly reduced compared to siblings (10.9%, Figure 6G; Supplemental Fig. 3A) at 3.5dpf.

At 5dpf, all BrdU<sup>+</sup> cells in the sibling controls had exited the cell cycle and incorporated into the neural retina (Figure 6D,G), whereas *dnmt1*<sup>-/-</sup> larvae retained 19.8% ( $p = 0.05$ ) of BrdU<sup>+</sup> nuclei within the CMZ and had fewer BrdU<sup>+</sup> cells overall within the retina (Figure 6F,G). Additionally, there was a significant decrease in the proportion of BrdU<sup>+</sup> nuclei in the GCL (9.8%,  $p < 0.0005$ ) (Figure 6G; Supplemental Fig S3B) compared to controls (21.4%). Surprisingly, among the cells that remained in the 5dpf *dnmt1*<sup>-/-</sup> CMZ, there was an increase in the BrdU<sup>+</sup> proportion when compared to siblings (19.76% vs. 0.9% respectively,  $p = 0.05$ ; Figure 6G; Supplemental Fig S3B) suggesting an inability for some RSCs to either successfully complete the cell cycle or to integrate into retinal laminae. These data also show that daughter cells produced from the *dnmt1*<sup>-/-</sup> CMZ proportionally incorporate into the INL and ONL at similar levels to those detected in controls (Figure 6G; Supplemental Fig S3B) supporting the notion that *dnmt1*<sup>-/-</sup> RSCs are still capable of producing neurons that can successfully integrate into these two layers of the retina.

### **Loss of *dnmt1* activity leads to altered Long Terminal Repeat retroelement expression within the CMZ.**

Half of the zebrafish genome is comprised of endogenous viral elements known as transposons<sup>59,60</sup>, and *dnmt1* is required for repressing the retroelement (RE) lineage of transposons<sup>37,61–63</sup>. Though many REs have lost their ability to “jump” throughout evolution, some still retain this ability<sup>64,65</sup>. These studies led us to hypothesize that aberrant DNA methylation resulting from loss of *dnmt1* activity in RSCs would result in upregulation of RE expression within the *dnmt1*<sup>-/-</sup> CMZ. To identify RE expression within the CMZ, we performed *in situ* hybridizations targeting several REs that belong to



the Long Terminal Repeat (LTR) class of retrotransposons, specifically *Bel20*, *ERV1*, *ERV1-N5*, *ERV4*, and *Gypsy10* LTRs. We noted endogenous expression of *Bel20*, *ERV4*, and *Gypsy10* REs within the CMZ but not the neural retina of control larvae at 4dpf (Figure 7A,D,E). This result was unexpected since REs can be deleterious to cellular function<sup>37,66–68</sup>. However, not all of the LTR REs were detected within control CMZs; *ERV1* and *ERV1-N5* expression was not detected in the CMZ of siblings (Figure 7B,C), but rather *ERV1-N5* seemed to be expressed within the ONL of some control larvae (Supplemental Fig. S4O). Remarkably, *dnmt1*<sup>-/-</sup> larvae had increased expression of *ERV1-N5* in the CMZ and within the overlying retinal pigmented epithelium (Figure 7H). The expression domains of *Bel20* and *ERV4* were expanded beyond the CMZ and into the neural retina of *dnmt1*<sup>-/-</sup> larvae (Figure 7F,I) when compared to controls. Of note, we also identified several non-ocular tissues that displayed altered RE expression between *dnmt1*<sup>-/-</sup> and sibling control larvae (Supplemental Fig S4). Interestingly, these LTR RE expression patterns were larvae-dependent, suggesting that not all RSCs respond uniformly to loss of *dnmt1* function.

#### **A *L1RE3-EGFP* transgene reports increased *LINE1* retrotransposition activity in *dnmt1*<sup>-/-</sup> CMZ.**

To expand our analysis of RE expression in *dnmt1*<sup>-/-</sup> RSCs, and more specifically, visualize retrotransposition activity *in vivo*, we generated a non-LTR, *LINE1* element transgenic reporter line by modifying the *pLRE3-EGFP* plasmid<sup>69,70</sup> (referred to as *L1RE3-EGFP* for the remainder of this study). The *L1RE3-EGFP* construct contains a human-derived *LINE1* RE sequence that requires retrotransposition for EGFP to be expressed and translated into a functional protein<sup>69</sup>. *p53* is known to repress REs and when used transiently in *p53*<sup>-/-</sup> zebrafish, *L1RE3-EGFP* was shown to have increased transposition activity and EGFP expression<sup>68</sup>. We validated the stability and effectiveness of the *L1RE3-EGFP* transgenic using again *p53* mutants<sup>48,68</sup> and immunolabeling for EGFP (Supplemental Fig S5A). When *L1RE3-EGFP* was incorporated into the *dnmt1*<sup>-/-</sup><sup>872</sup> genetic background, ectopic EGFP expression could be seen within the *dnmt1*<sup>-/-</sup> eye when compared to control siblings (Supplemental Fig S5B,C). Notably, we detected ectopic EGFP expression more frequently within the *dnmt1*<sup>-/-</sup> CMZ at both 3dpf (Figure 8C) and 4dpf (Figure 8D) timepoints when compared to controls (Figure 8A,B). However, like RE expression, clonal EGFP expression patterns were variable, both within and between sibling controls and *dnmt1*<sup>-/-</sup> larvae, again suggesting that the effects of *dnmt1* loss is variable from cell to cell and larva to larva.

## Discussion:

The zebrafish, with its lifelong, actively cycling RSCs within the CMZ, is a powerful model through which we can address how epigenetic regulators function to maintain these stem/progenitor cell populations *in vivo*. This study focused on the role of the DNA maintenance methyltransferase, *dnmt1*, within the CMZ, with the goal of determining how *dnmt1* activity facilitates RSC maintenance. Previous work has shown that loss of *dnmt1* function results in ocular defects<sup>27,45,46,52</sup>, but no studies have yet analyzed RSC populations and determined whether *dnmt1* activity modulates their behavior.

Here, we demonstrate that *dnmt1* is essential for RSC homeostasis by maintaining CMZ-specific gene expression (Figure 4), facilitating cell cycle progression (Figure 5), and incorporation of CMZ-derived cells into the retina (Figure 6). These data are consistent with *Dnmt1* functions described in other *in vivo* progenitor models such as the lens<sup>27</sup>, hippocampus<sup>50</sup>, kidney<sup>62</sup>, pancreas<sup>30</sup> and intestine<sup>51</sup>. RSCs in S- and G2/M-phases of the cell cycle were detected in reduced proportions in the *dnmt1*<sup>-/-</sup> CMZ and this correlated with a reduction in CMZ expression of genes encoding proteins that function in cell cycle progression, namely *ccnD1* (Figure 4G-H) and *cdkn1ca* (Figure 4O-P). Defects in cell cycle progression may also contribute to aberrant daughter cell integration into retinal laminae detected in *dnmt1*<sup>-/-</sup> larvae (Figure 6). Although our data demonstrate an overall loss of RSCs and their progeny, this RSC depletion is independent of the p53-driven apoptotic pathway (Figures 2 and 3) signifying additional mechanisms of cell loss are at play.

While loss of *p53* function in the *dnmt1*<sup>-/-</sup> background significantly rescued cell death within the laminated retina, validating that the *p53*<sup>zdf1</sup> allele is in fact inhibiting *p53*-driven apoptosis, loss of *p53* in the *dnmt1*<sup>-/-</sup> CMZ had no effect on CMZ cell numbers suggesting a *p53*-independent cell death pathway is likely modulated by *dnmt1* in the CMZ<sup>71</sup>. Recent reports have demonstrated an upregulation of an innate inflammatory response in *dnmt1*<sup>-/-</sup> larvae<sup>37</sup>. Necroptosis, a programmed cell death pathway tightly linked to a cell's innate viral detection system and inflammatory responses, also results in DNA fragmentation and, in its later stages, is detected by TUNEL<sup>71</sup>. Accordingly, we considered the possibility that *dnmt1*<sup>-/-</sup> RSCs were instead lost via necroptosis. We tested this hypothesis using several chemical inhibitors of necroptosis, some of which have been reported to function in the zebrafish<sup>72,73</sup>; however, we were unable to replicate

necroptotic inhibition nor validate drug efficacy. None the less, we predict that either necroptosis or pyroptosis (a programmed cell death pathway triggered by intracellular bacterial infections<sup>74,75</sup>) are the most likely mechanisms of cell death in *dnmt1*-deficient RSCs, but this will require the development of new tools to enable further analysis.

Alterations in RE expression activity the *dnmt1*<sup>-/-</sup> CMZ (Figures 7,8) are exciting given Dnmt1's known roles in repressing RE activity<sup>36-39</sup>. RE expression was aberrant in most *dnmt1*<sup>-/-</sup> CMZs examined (Figure 7); however, expression changes and levels were variable between larvae, suggesting that the location and extent of genomic hypomethylation resulting from loss of *dnmt1* function is inherently variable between cells of each larva. Previous reports demonstrated innate RE activity within somatic neural tissue<sup>64,65,76-78</sup>. Indeed, we detected retrotransposition activity within the larval zebrafish brain (Supplemental Fig S5D-I) of both siblings and *dnmt1*<sup>-/-</sup> larvae from 2-4dpf, similar to activity detected in human hippocampal neurons<sup>64,65,78</sup>. However, RE retrotransposition is highly variable between larvae. Further studies will be required to determine what cellular processes might sensitize a cell- or tissue-type to upregulate REs and whether these REs have a mechanistic purpose within the cell.

In conclusion, our results demonstrate that *dnmt1* functions to maintain RSC proliferation, gene expression, and integration of RSC daughters into the retina. Additionally, some REs are innately expressed within RSCs, however *dnmt1* function is required to maintain tight control of these viral elements. Without *dnmt1* activity, *LTR* expression remains active within the retina and *L1RE3-EGFP* retrotransposition activity is increased. Interestingly, RE activity within RSCs does not result in p53-mediated apoptosis, supporting a model in which *dnmt1*<sup>-/-</sup> RSCs are lost through another mechanism of cell death. As discussed above, we predict that this increase in RE activity most likely activates necroptotic or pyroptotic cell death pathways, which are both known to result from intracellular responses to invading pathogens<sup>71,74,75</sup>. Regarding the innate *LTR* expression within *dnmt1*<sup>+/+</sup> RSCs, in conjunction with previous reports of inherent RE activity within human neural tissue, it is worth considering how RE activity may contribute to neural stem cell biology. It is well known that dysregulation of REs is a hallmark of many human neurodegenerative diseases<sup>67,79-82</sup>. Future evaluations regarding the

innate cost-to-benefit ratio of RE activity could provide crucial evidence for the development of neurodegenerative therapies.

## **Methods**

### ***Zebrafish maintenance***

Zebrafish (*Danio rerio*) were maintained at 28.5°C on a 14 h light/ 10 h dark cycle. All protocols used within this study were approved by the Institutional Animal Care and Use Committee of The University of Pittsburgh School of Medicine, and conform to the National Institutes of Health Guide for the Care and Use of Laboratory Animals. Mutant alleles used in this study were *dnmt1*<sup>s872</sup> and *tp53*<sup>zdf1</sup>. *dnmt1*<sup>s872</sup> and *tp53*<sup>zdf1</sup> zebrafish were genotyped using BioRad's CFX Manager 3.1 and Precision Melt Analysis software (v4.0.52.0602). All genotyping primers are listed in Supplemental Table 1. Transgenic *Tg(CMV:Has.L1RE3,EGFP,myl7:EGFP)*<sup>pt701</sup> zebrafish were generated as described<sup>83</sup> using constructs generously provided by Kristen Kwan and Chi-Bin Chien (University of Utah, Salt Lake City).

### ***BrdU labeling***

To assess cellular proliferation, larvae were incubated in 10mM BrdU for either 2 or 12 hours, after which the BrdU was washed out and larvae were either collected or used for BrdU pulse-chase experiments.

### ***Immunohistochemistry and fluorescent labeling:***

Immunohistochemistry performed as described previously<sup>84</sup>. The following antibodies and dilutions were used: anti-BrdU antibody (Abcam, ab6326, 1:250), anti-phospho-histone H3 (Ser10) (EMD Millipore, 06-570, 1:250), anti-GFP (Thermo Fisher Scientific, A-11122, 1:50), goat anti-rat Cy3 secondary (Jackson Immuno Research, 112-165-003, 1:500), goat anti-rabbit Cy3 secondary (Jackson Immuno Research, 111-165-144, 1:500), and goat anti-rabbit Cy5 secondary (Jackson Immuno Research, 711-035-152, 1:500). Nuclei were counterstained with DAPI using Vectashield with DAPI (Vector Laboratories, H-1200). F-actin was labeled using AlexaFluor 633 Phalloidin (Thermo Fisher Scientific, 1:33, A22284). TUNEL-labeling was accomplished using TMR-Red In situ Cell Death Detection Kit (Sigma Aldrich, 12156792910).

### ***Cloning and Probe Synthesis***

CMZ-specific probes have been published previously<sup>14,27</sup>. Retroelement probes were generated using reverse transcription-polymerase chain reaction (RT-PCR) on Trizol-isolated RNA from 24hpf and 5dpf embryos. Primer sequences were kindly provided by Dr. Kirsten Sadler (NYU Abu Dhabi) and PCR products were ligated into pGEM-T-easy vector (Promega Cat# PR-A1360) and verified by Sanger sequencing. Plasmids containing the correct clones were linearized and used as templates to *in vitro* transcribe digoxigenin-labeled RNA probes (Roche).

### ***In situ hybridization***

Hybridizations using digoxigenin labeled antisense RNA probes were performed essentially as described<sup>85</sup>, except that they were pre-incubated with 1 mg/mL Collagenase type 1A (Sigma, C9891) to allow probe diffusion throughout the tissue. All probe primer sequences and plasmid construct information are listed in Supplemental Table 1.

### ***Microscopy and image processing***

For sectioned embryos, imaging was performed with an Olympus FV1200 confocal microscope. Confocal Z-stacks were collected in 1µm optical sections. Z-stacks were max-projected using ImageJ (version 1.52r) software (National Institutes of Health) and quantification was conducted using the “Cell Counter” plugin. Figures were prepared using Adobe Illustrator CS6 (Adobe Systems). *In situ* cryosections were imaged utilizing a Leica DM2500 with a 100X oil immersion objective (NA: 1.25).

### **Cell counting and quantification:**

Each data point was collected from an individual larva. Each larva was analyzed using three consecutive 12 µm sections of the central retina using the optic nerve and lens morphology as retinal landmarks. The average of the three consecutive sections was used as a single data point ( $n \geq 4$  for all datasets). Proportions of retinal domains were calculated by dividing the number of DAPI-labeled nuclei in each domain over the total number of retinal nuclei.

## Statistics

For all statistical analysis, data were imported into GraphPad Prism 8 software. Quantification of nuclei and immunolabeled cells was statistically assessed using Student's two-tailed unpaired T-test with  $p < 0.05$  as a significance threshold.

## Generation of *Tg(hLINE1-EGFP)*:

pLRE-mEGFP plasmid was generously donated by Dr. John V. Moran (The University of Michigan School of Medicine)<sup>69</sup>. The *Hsa.L1RE3-EGFP* sequence was isolated from the pCEP4 backbone using NotI and Sall restriction enzymes and then inserted into pME-MCS plasmid from the Tol2 Gateway Kit. LR Clonase II Plus was used to carry out all Multisite Gateway assembly reactions<sup>83</sup> using p5E-MCS (19ng), pME-Hsa.L1RE3-EGFP (77ng), p3E-polyA (19ng), and pDestTol2CG2 (103ng) plasmids. Capped Tol2 mRNA was synthesized from pCS2FA-transposase using the Ambion mMessage mMachine Sp6 *in vitro* transcription kit (Thermo Fisher Scientific, AM1340). Tol2 mRNA (75pg) was co-injected with *pDEST-Hsa.L1RE3-EGFP* (40 pg) into *dnmt1<sup>+/-</sup>;p53<sup>+/-</sup>* incross embryos at the 1-cell stage. Embryos displaying acceptable levels of mosaic *myl7:EGFP* expression were raised to adulthood, and outcrossed to screen for founders. F<sub>1</sub> embryos displaying ubiquitous *myl7:EGFP* expression were isolated and reared to generate the stable line *Tg(CMV:Hsa.L1RE3,EGFP,myl7:EGFP)<sup>pt701</sup>*.

## References:

1. Fischer, A. J., Bosse, J. L. & El-Hodiri, H. M. Reprint of: the ciliary marginal zone (CMZ) in development and regeneration of the vertebrate eye. *Exp. Eye Res.* **123**, 115–20 (2014).
2. Wehman, A. M., Staub, W., Meyers, J. R., Raymond, P. A. & Baier, H. Genetic dissection of the zebrafish retinal stem-cell compartment. *Developmental biology* **281**, 53–65 (2005).
3. Raymond, P. A., Barthel, L. K., Bernardos, R. L. & Perkowski, J. J. Molecular characterization of retinal stem cells and their niches in adult zebrafish. *BMC Developmental Biology* **6**, (2006).
4. Marcus, R. C., Delaney, C. L. & Easter, S. S. J. Neurogenesis in the visual system of embryonic and adult zebrafish (*Danio rerio*). *Visual neuroscience* **16**, 417–424 (1999).
5. Casarosa, S. *et al.* Genetic analysis of metamorphic and premetamorphic *Xenopus* ciliary marginal zone. *Dev. Dyn.* **233**, 646–51 (2005).
6. Perron, M., Kanekar, S., Vetter, M. L. & Harris, W. A. The genetic sequence of retinal development in the ciliary margin of the *Xenopus* eye. *Dev. Biol.* **199**, 185–200 (1998).
7. Dixit, R. *et al.* Gene expression is dynamically regulated in retinal progenitor cells prior to and during overt cellular differentiation. *Gene Expr. Patterns* **14**, 42–54 (2014).
8. Bélanger, M.-C., Robert, B. & Cayouette, M. Msx1-Positive Progenitors in the Retinal Ciliary Margin Give Rise to Both Neural and Non-neural Progenies in Mammals. *Dev. Cell* **40**, 137–150 (2017).
9. Marcucci, F. *et al.* The ciliary margin zone of the mammalian retina generates retinal ganglion cells. *Cell reports* **17**, 3153–3164 (2016).
10. Tropepe, V. *et al.* Retinal stem cells in the adult mammalian eye. *Science* **287**, 2032–2036 (2000).
11. Del Debbio, C. B., Peng, X., Xiong, H. & Ahmad, I. Adult ciliary epithelial stem cells generate functional neurons and differentiate into both early and late born retinal neurons under non-cell autonomous influences. *BMC neuroscience* **14**, 130 (2013).
12. Das, A. V. *et al.* Retinal properties and potential of the adult mammalian ciliary epithelium stem cells. *Vision research* **45**, 1653–1666 (2005).

13. Ballios, B. G., Clarke, L., Coles, B. L., Shoichet, M. S. & Van Der Kooy, D. The adult retinal stem cell is a rare cell in the ciliary epithelium whose progeny can differentiate into photoreceptors. *Biology open* **1**, 237–246 (2012).
14. Cervený, K. L. *et al.* The zebrafish flotter mutant reveals that the local retinal environment promotes the differentiation of proliferating precursors emerging from their stem cell niche. *Development* **137**, 2107–2115 (2010).
15. Borday, C. *et al.* Antagonistic cross-regulation between Wnt and Hedgehog signalling pathways controls post-embryonic retinal proliferation. *Development* **139**, 3499–3509 (2012).
16. Reinhardt, R. *et al.* Sox2, Tlx, Gli3, and Her9 converge on Rx2 to define retinal stem cells in vivo. *The EMBO journal* **34**, 1572–1588 (2015).
17. Corso-Díaz, X., Jaeger, C., Chaitankar, V. & Swaroop, A. Epigenetic control of gene regulation during development and disease: A view from the retina. *Prog Retin Eye Res* **65**, 1–27 (2018).
18. Aldiri, I. *et al.* The Dynamic Epigenetic Landscape of the Retina During Development, Reprogramming, and Tumorigenesis. *Neuron* **94**, 550–568.e10 (2017).
19. Marques, I. J., Lupi, E. & Mercader, N. Model systems for regeneration: zebrafish. *Development* **146**, (2019).
20. Liu, K., Petree, C., Requena, T., Varshney, P. & Varshney, G. K. Expanding the CRISPR Toolbox in Zebrafish for Studying Development and Disease. *Front Cell Dev Biol* **7**, 13 (2019).
21. Yoder, J. A., Soman, N. S., Verdine, G. L. & Bestor, T. H. DNA (cytosine-5)-methyltransferases in mouse cells and tissues. Studies with a mechanism-based probe. *J. Mol. Biol.* **270**, 385–95 (1997).
22. Bestor, T. H. The DNA methyltransferases of mammals. *Hum. Mol. Genet.* **9**, 2395–402 (2000).
23. Goll, M. G. & Halpern, M. E. DNA methylation in zebrafish. *Prog Mol Biol Transl Sci* **101**, 193–218 (2011).
24. Jacob, V. *et al.* DNA hypomethylation induces a DNA replication-associated cell cycle arrest to block hepatic outgrowth in uhrf1 mutant zebrafish embryos. *Development* **142**, 510–21 (2015).



25. Unterberger, A., Andrews, S. D., Weaver, I. C. G. & Szyf, M. DNA methyltransferase 1 knockdown activates a replication stress checkpoint. *Mol. Cell. Biol.* **26**, 7575–86 (2006).
26. Schneider, K. *et al.* Dissection of cell cycle-dependent dynamics of Dnmt1 by FRAP and diffusion-coupled modeling. *Nucleic Acids Res.* **41**, 4860–76 (2013).
27. Tittle, R. K. *et al.* Uhrf1 and Dnmt1 are required for development and maintenance of the zebrafish lens. *Dev. Biol.* **350**, 50–63 (2011).
28. Sen, G. L., Reuter, J. A., Webster, D. E., Zhu, L. & Khavari, P. A. DNMT1 maintains progenitor function in self-renewing somatic tissue. *Nature* **463**, 563–7 (2010).
29. Maenohara, S. *et al.* Role of UHRF1 in de novo DNA methylation in oocytes and maintenance methylation in preimplantation embryos. *PLoS Genet.* **13**, e1007042 (2017).
30. Anderson, R. M. *et al.* Loss of Dnmt1 catalytic activity reveals multiple roles for DNA methylation during pancreas development and regeneration. *Dev. Biol.* **334**, 213–23 (2009).
31. Kaji, K. *et al.* DNMT1 is a required genomic regulator for murine liver histogenesis and regeneration. *Hepatology* **64**, 582–98 (2016).
32. Liu, X. *et al.* DNA methyltransferase 1 functions through C/ebpa to maintain hematopoietic stem and progenitor cells in zebrafish. *J Hematol Oncol* **8**, 15 (2015).
33. Wanner, N. *et al.* DNA Methyltransferase 1 Controls Nephron Progenitor Cell Renewal and Differentiation. *J. Am. Soc. Nephrol.* **30**, 63–78 (2019).
34. Chen, T. *et al.* Complete inactivation of DNMT1 leads to mitotic catastrophe in human cancer cells. *Nat. Genet.* **39**, 391–6 (2007).
35. Jackson-Grusby, L. *et al.* Loss of genomic methylation causes p53-dependent apoptosis and epigenetic deregulation. *Nat. Genet.* **27**, 31–9 (2001).
36. Walsh, C. P., Chaillet, J. R. & Bestor, T. H. Transcription of IAP endogenous retroviruses is constrained by cytosine methylation. *Nat. Genet.* **20**, 116–7 (1998).

37. Chernyavskaya, Y. *et al.* Loss of DNA methylation in zebrafish embryos activates retrotransposons to trigger antiviral signaling. *Development* **144**, 2925–2939 (2017).
38. Ramesh, V. *et al.* Loss of Uhrf1 in neural stem cells leads to activation of retroviral elements and delayed neurodegeneration. *Genes Dev.* **30**, 2199–2212 (2016).
39. Jönsson, M. E. *et al.* Activation of neuronal genes via LINE-1 elements upon global DNA demethylation in human neural progenitors. *Nat Commun* **10**, 3182 (2019).
40. Rajshekar, S. *et al.* Pericentromeric hypomethylation elicits an interferon response in an animal model of ICF syndrome. *Elife* **7**, (2018).
41. Golshani, P., Hutnick, L., Schweizer, F. & Fan, G. Conditional Dnmt1 deletion in dorsal forebrain disrupts development of somatosensory barrel cortex and thalamocortical long-term potentiation. *Thalamus Relat Syst* **3**, 227–233 (2005).
42. Hutnick, L. K. *et al.* DNA hypomethylation restricted to the murine forebrain induces cortical degeneration and impairs postnatal neuronal maturation. *Hum. Mol. Genet.* **18**, 2875–88 (2009).
43. Sheaffer, K. L. *et al.* DNA methylation is required for the control of stem cell differentiation in the small intestine. *Genes Dev.* **28**, 652–64 (2014).
44. Fan, G. *et al.* DNA methylation controls the timing of astrogliogenesis through regulation of JAK-STAT signaling. *Development* **132**, 3345–56 (2005).
45. Nasonkin, I. O. *et al.* Conditional knockdown of DNA methyltransferase 1 reveals a key role of retinal pigment epithelium integrity in photoreceptor outer segment morphogenesis. *Development* **140**, 1330–1341 (2013).
46. Singh, R. K. *et al.* Dnmt1, Dnmt3a and Dnmt3b cooperate in photoreceptor and outer plexiform layer development in the mammalian retina. *Exp. Eye Res.* **159**, 132–146 (2017).
47. Georgia, S., Kanji, M. & Bhushan, A. DNMT1 represses p53 to maintain progenitor cell survival during pancreatic organogenesis. *Genes Dev.* **27**, 372–7 (2013).

48. Berghmans, S. *et al.* tp53 mutant zebrafish develop malignant peripheral nerve sheath tumors. *Proc. Natl. Acad. Sci. U.S.A.* **102**, 407–12 (2005).
49. Sidi, S. *et al.* Chk1 suppresses a caspase-2 apoptotic response to DNA damage that bypasses p53, Bcl-2, and caspase-3. *Cell* **133**, 864–77 (2008).
50. Noguchi, H. *et al.* DNA Methyltransferase 1 Is Indispensable for Development of the Hippocampal Dentate Gyrus. *J. Neurosci.* **36**, 6050–68 (2016).
51. Elliott, E. N., Sheaffer, K. L., Schug, J., Stappenbeck, T. S. & Kaestner, K. H. Dnmt1 is essential to maintain progenitors in the perinatal intestinal epithelium. *Development* **142**, 2163–72 (2015).
52. Rai, K. *et al.* Zebra fish Dnmt1 and Suv39h1 regulate organ-specific terminal differentiation during development. *Mol. Cell. Biol.* **26**, 7077–85 (2006).
53. Smets, M. *et al.* DNMT1 mutations found in HSNIE patients affect interaction with UHRF1 and neuronal differentiation. *Hum. Mol. Genet.* **26**, 1522–1534 (2017).
54. Pujic, Z. *et al.* Reverse genetic analysis of neurogenesis in the zebrafish retina. *Dev. Biol.* **293**, 330–47 (2006).
55. Tsingos, E. *et al.* Retinal stem cells modulate proliferative parameters to coordinate post-embryonic morphogenesis in the eye of fish. *Elife* **8**, (2019).
56. Centanin, L. *et al.* Exclusive multipotency and preferential asymmetric divisions in post-embryonic neural stem cells of the fish retina. *Development* **141**, 3472–3482 (2014).
57. Haruta, M. *et al.* Loss of maintenance DNA methylation results in abnormal DNA origin firing during DNA replication. *Biochemical and biophysical research communications* **469**, 960–966 (2016).
58. El Yakoubi, W. *et al.* Hes4 controls proliferative properties of neural stem cells during retinal ontogenesis. *Stem Cells* **30**, 2784–95 (2012).
59. Chalopin, D., Naville, M., Plard, F., Galiana, D. & Volff, J.-N. Comparative analysis of transposable elements highlights mobilome diversity and evolution in vertebrates. *Genome Biol Evol* **7**, 567–80 (2015).

60. Gao, B. *et al.* The contribution of transposable elements to size variations between four teleost genomes. *Mobile DNA* **7**, 4 (2016).
61. Maugeri, A. *et al.* Characterization of SIRT1/DNMTs Functions and LINE-1 Methylation in Patients with Age-Related Macular Degeneration. *J Clin Med* **8**, (2019).
62. Li, S.-Y. *et al.* DNMT1 in Six2 Progenitor Cells Is Essential for Transposable Element Silencing and Kidney Development. *J. Am. Soc. Nephrol.* **30**, 594–609 (2019).
63. Liang, G. *et al.* Cooperativity between DNA methyltransferases in the maintenance methylation of repetitive elements. *Mol. Cell. Biol.* **22**, 480–91 (2002).
64. Baillie, J. K. *et al.* Somatic retrotransposition alters the genetic landscape of the human brain. *Nature* **479**, 534–7 (2011).
65. Upton, K. R. *et al.* Ubiquitous L1 mosaicism in hippocampal neurons. *Cell* **161**, 228–39 (2015).
66. Thomas, C. A. *et al.* Modeling of TREX1-Dependent Autoimmune Disease using Human Stem Cells Highlights L1 Accumulation as a Source of Neuroinflammation. *Cell Stem Cell* **21**, 319–331.e8 (2017).
67. Tam, O. H., Ostrow, L. W. & Gale Hammell, M. Diseases of the nERVous system: retrotransposon activity in neurodegenerative disease. *Mob DNA* **10**, 32 (2019).
68. Wylie, A. *et al.* p53 genes function to restrain mobile elements. *Genes & development* **30**, 64–77 (2016).
69. Ostertag, E. M., Luning Prak, E. T., DeBerardinis, R. J., Moran, J. V. & Kazazian Jr, H. H. Determination of L1 retrotransposition kinetics in cultured cells. *Nucleic Acids Research* **28**, 1418–1423 (2000).
70. Ostertag, E. M. *et al.* A mouse model of human L1 retrotransposition. *Nature genetics* **32**, 655 (2002).
71. Galluzzi, L. *et al.* Essential versus accessory aspects of cell death: recommendations of the NCCD 2015. *Cell Death Differ.* **22**, 58–73 (2015).
72. Viringipurampeer, I. A. *et al.* Rip3 knockdown rescues photoreceptor cell death in blind pde6c zebrafish. *Cell Death Differ.* **21**, 665–75 (2014).

73. Viringipurampeer, I. A. *et al.* Pax2 regulates a fadd-dependent molecular switch that drives tissue fusion during eye development. *Hum. Mol. Genet.* **21**, 2357–69 (2012).
74. Liu, X. & Lieberman, J. A Mechanistic Understanding of Pyroptosis: The Fiery Death Triggered by Invasive Infection. *Adv. Immunol.* **135**, 81–117 (2017).
75. Hato, T. & Dagher, P. C. How the Innate Immune System Senses Trouble and Causes Trouble. *Clin J Am Soc Nephrol* **10**, 1459–69 (2015).
76. Muotri, A. R. *et al.* Somatic mosaicism in neuronal precursor cells mediated by L1 retrotransposition. *Nature* **435**, 903–10 (2005).
77. Coufal, N. G. *et al.* L1 retrotransposition in human neural progenitor cells. *Nature* **460**, 1127 (2009).
78. Erwin, J. A. *et al.* L1-associated genomic regions are deleted in somatic cells of the healthy human brain. *Nat. Neurosci.* **21**, 1016 (2018).
79. Misiak, B., Ricceri, L. & Sasiadek, M. M. Transposable Elements and Their Epigenetic Regulation in Mental Disorders: Current Evidence in the Field. *Front Genet* **10**, 580 (2019).
80. Zhao, K. *et al.* Modulation of LINE-1 and Alu/SVA retrotransposition by Aicardi-Goutières syndrome-related SAMHD1. *Cell Rep* **4**, 1108–15 (2013).
81. Pereira, G. C. *et al.* Properties of LINE-1 proteins and repeat element expression in the context of amyotrophic lateral sclerosis. *Mob DNA* **9**, 35 (2018).
82. Li, S. *et al.* Hypomethylation of LINE-1 elements in schizophrenia and bipolar disorder. *J Psychiatr Res* **107**, 68–72 (2018).
83. Kwan, K. M. *et al.* The Tol2kit: a multisite gateway-based construction kit for Tol2 transposon transgenesis constructs. *Dev. Dyn.* **236**, 3088–99 (2007).
84. Uribe, R. A. & Gross, J. M. Immunohistochemistry on cryosections from embryonic and adult zebrafish eyes. *CSH Protoc* **2007**, pdb.prot4779 (2007).
85. Jowett, T. & Lettice, L. Whole-mount in situ hybridizations on zebrafish embryos using a mixture of digoxigenin- and fluorescein-labelled probes. *Trends Genet.* **10**, 73–4 (1994).



## **Acknowledgements**

We thank members of the Gross lab, Elizabeth Phair, Tom Holkenborg and the University of Pittsburgh zebrafish community for helpful comments and suggestions on this work, and Dr. Hugh Hammer and the University of Pittsburgh Department for Laboratory Animal Research for fish maintenance. Dr. Stephen W. Wilson kindly provided the *col15a1b* plasmid. Dr. Kirsten Sadler kindly provided retroelement primer sequences for the *in situ* probes used in this study. Dr. John V. Moran kindly provided the *pLRE-mEGFP1* plasmid. We acknowledge support from NIH Grant RO1 EY29031 and NIH CORE Grant P30-EY08098 to the Department of Ophthalmology, the Eye and Ear Foundation of Pittsburgh, and from an unrestricted grant from Research to Prevent Blindness, New York, NY. Fish lines were obtained from the Zebrafish International Resource Center which is supported by the NIH.

***Contributions:***

J.M.G and K.M.A. designed and conceived the study; K.M.A. collected all samples and performed the experiments and analyses; J.M.G and K.M.A. interpreted the results, wrote and reviewed the manuscript.

***Competing Interests:***

The authors declare no competing interests.



# Figure Legends:

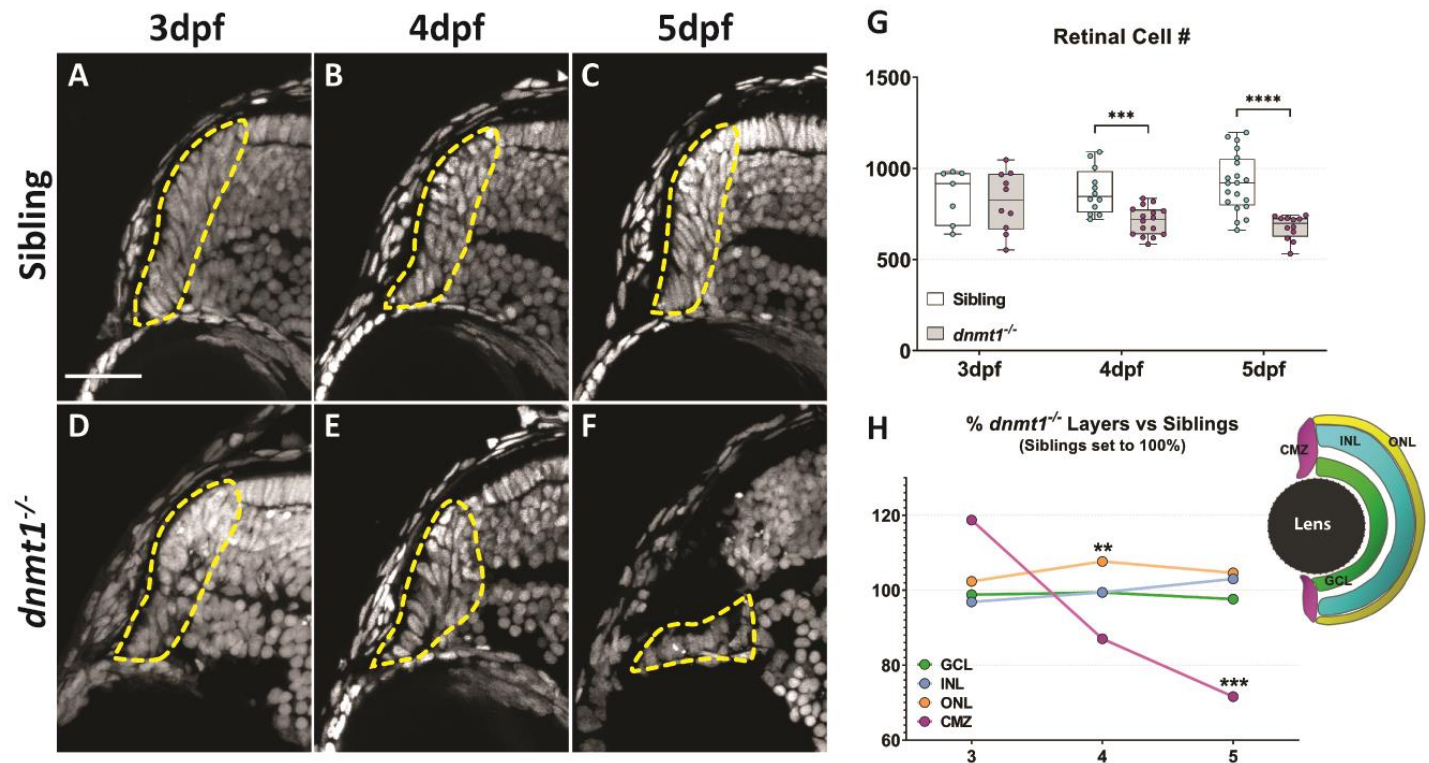

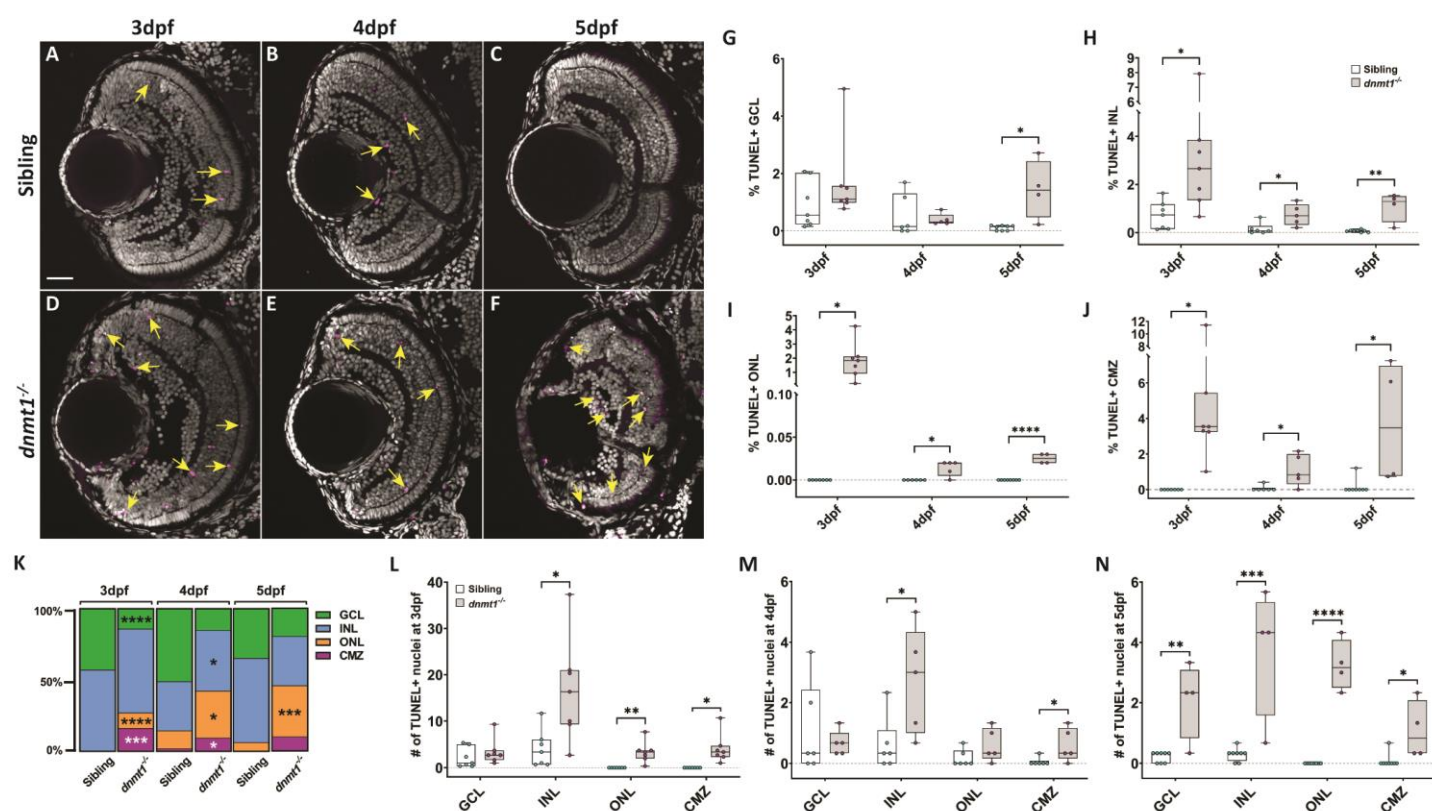

**Figure 2. Cell death is elevated in the *dnmt1*<sup>-/-</sup> CMZ.** A-F. *dnmt1* sibling (A-C) and mutant (D-F) retinæ labeled with DAPI (gray; nuclei) and TUNEL (magenta; dsDNA breaks) from 3-5dpf. G-J. Proportion of retinal layers (GCL, INL, ONL, and CMZ) labeled by TUNEL staining. K. Proportion of TUNEL<sup>+</sup> cells within each layer from 3-5dpf. L-N. Average number of TUNEL<sup>+</sup> cells in each retinal layer of siblings and *dnmt1*<sup>-/-</sup> larvae from 3-5dpf. Yellow arrows in A-F indicate TUNEL<sup>+</sup> nuclei. Scale bars = 30  $\mu$ m. \* $p$  < 0.05, \*\* $p$  < 0.005, \*\*\* $p$  < 0.0005, \*\*\*\* $p$  < 0.00005. Dorsal is up in all images.

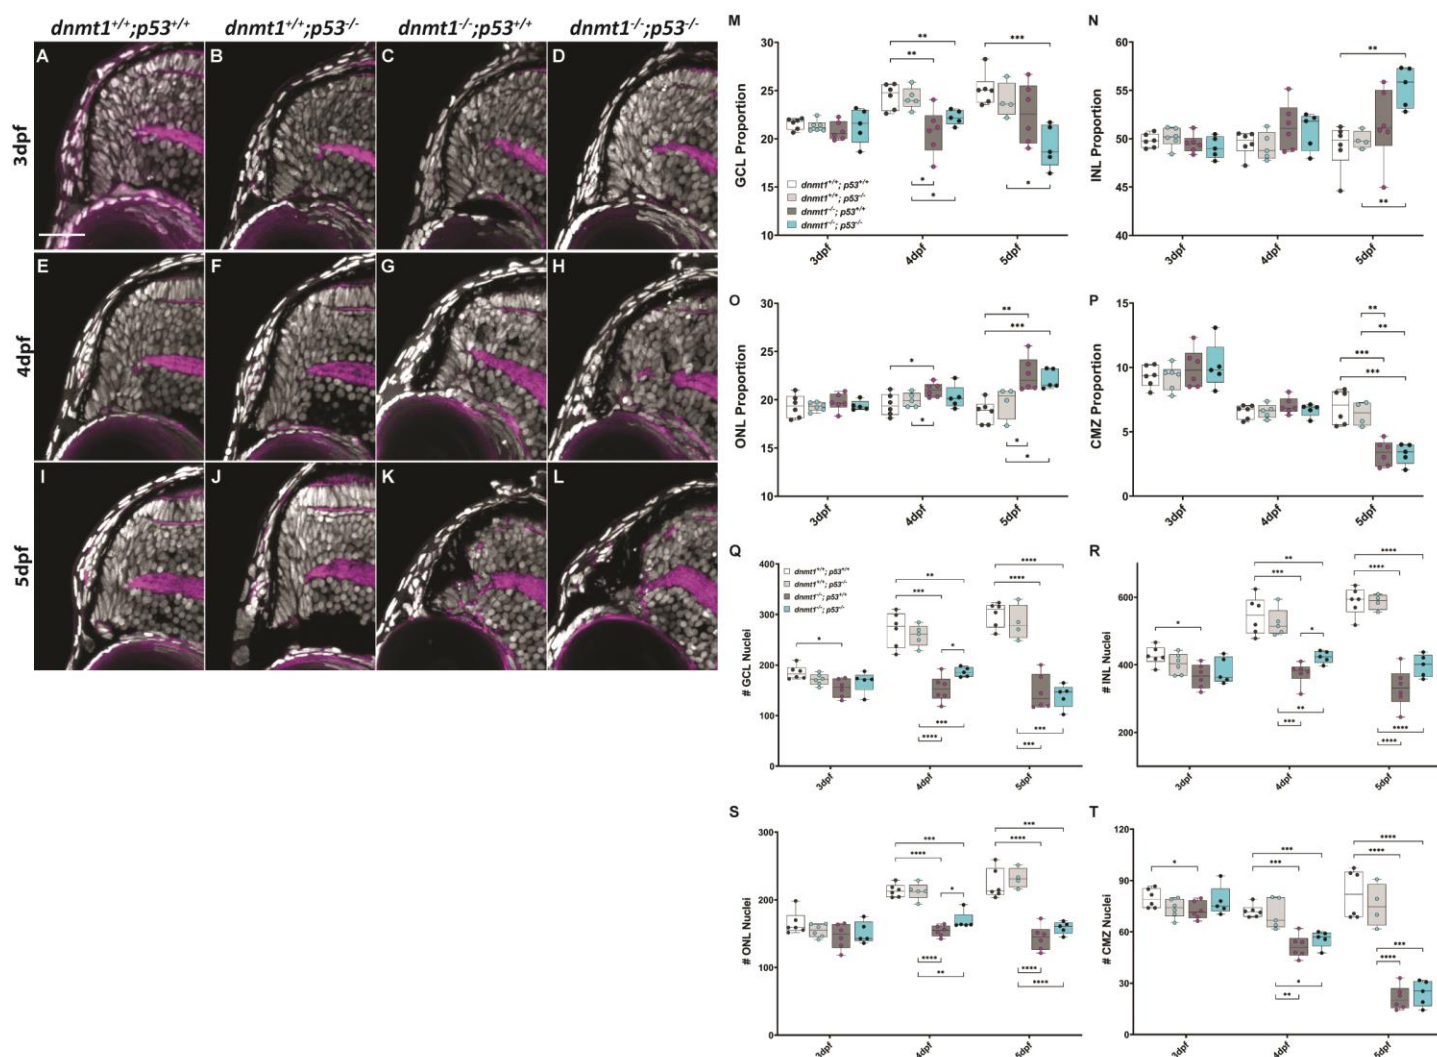

**Figure 3. Loss of p53 function does not rescue the *dnmt1*<sup>-/-</sup> CMZ phenotype. A-L.** Transverse sections of the dorsal CMZ in wildtype (A, E, I), *dnmt1*<sup>+/+</sup>; *p53*<sup>-/-</sup> (B, F, J), *dnmt1*<sup>-/-</sup>; *p53*<sup>+/+</sup> (C, G, K), *dnmt1*<sup>-/-</sup>; *p53*<sup>-/-</sup> (D, H, L) larvae from 3-5dpf. Nuclei labeled with DAPI (gray) and F- actin labeled with phalloidin (magenta). **M-P.** Graphs depicting changes in retinal domain proportions over time. **Q-T.** Number of nuclei in each retinal domain of *dnmt1*<sup>+/+</sup>; *p53*<sup>+/+</sup>, *dnmt1*<sup>+/+</sup>; *p53*<sup>-/-</sup>, *dnmt1*<sup>-/-</sup>; *p53*<sup>+/+</sup>, and *dnmt1*<sup>-/-</sup>; *p53*<sup>-/-</sup> larvae from 3-5dpf. GCL: ganglion cell layer; INL: inner nuclear layer; ONL: outer nuclear layer; CMZ: ciliary marginal zone. Scale bars = 25  $\mu$ m. \**p* < 0.05; \*\**p* < 0.005; \*\*\**p* < 0.0005; \*\*\*\**p* < 0.00005. Dorsal is up in all images.



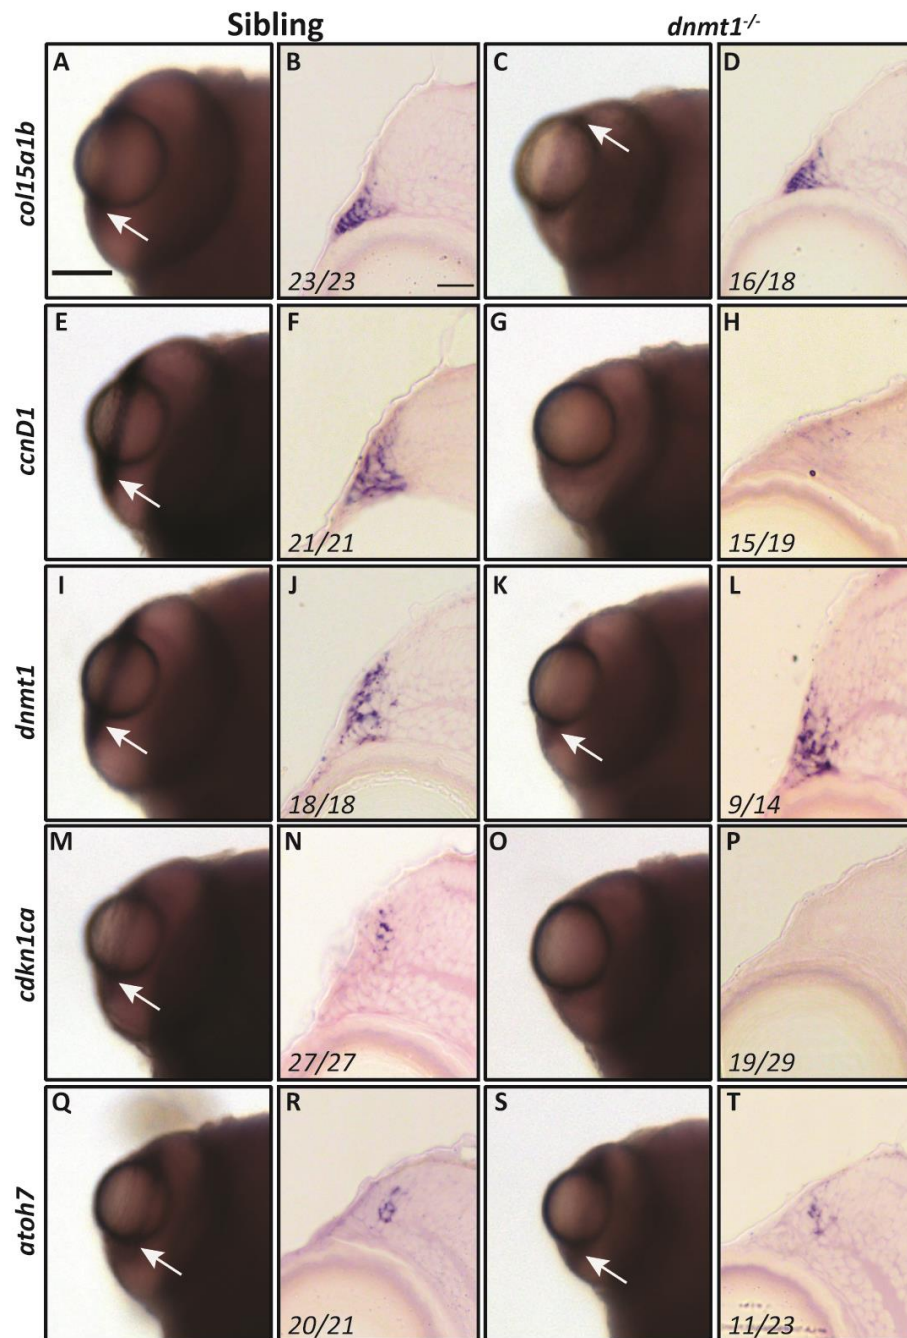

**Figure 4. *dnmt1* is required to maintain RSC gene expression.** Gene expression shown in whole mount (A, C, E, G, I, K, M, O, Q, S) and transverse cryosections (B, D, F, H, J, L, N, P, R, T) between siblings and *dnmt1*<sup>-/-</sup> larvae. A-D. *col15a1b* expression. E-H. *ccnD1* expression. I-L. *dnmt1* expression. M-P. *cdkn1ca* expression. Q-T. *atoh7* expression. Numbers in transverse cryosections designate the number of larvae that showed the displayed expression pattern vs. the total number of larvae analyzed. Scale bars = 75 mm (whole mount) and 10 μm (transverse sections). Anterior is up in all whole-mounts and dorsal is up for all section images.

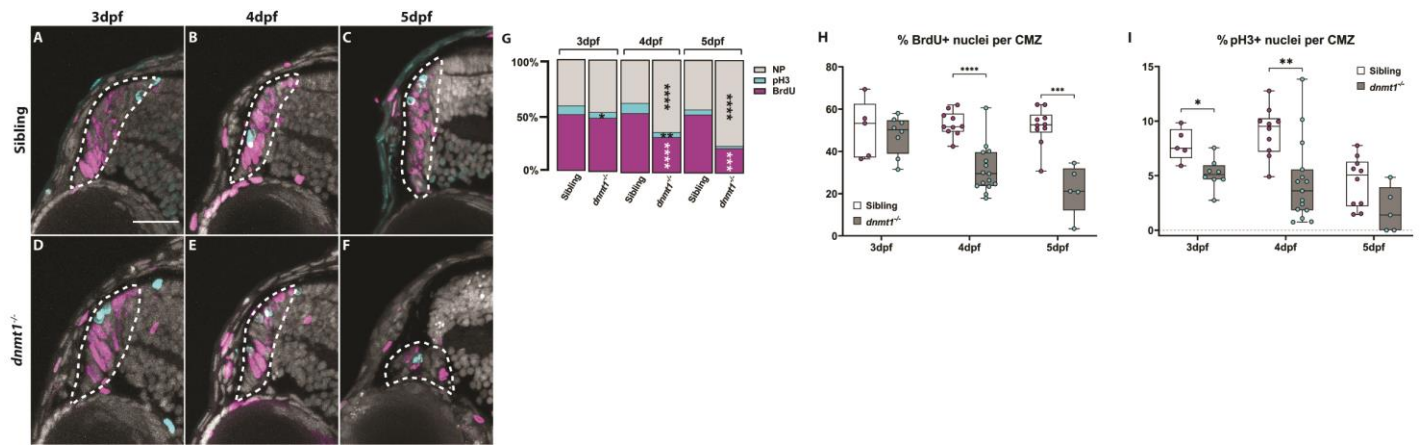

**Figure 5. RSCs require *dnmt1* function to maintain proliferation.** **A-F.** Transverse sections of siblings (**A-C**) and *dnmt1*<sup>-/-</sup> (**D-F**) larvae from 3-5 dpf. Nuclei labeled with DAPI (gray). Cells in S-phase indicated by BrdU incorporation (magenta). Mitotic cells are labeled by a pH3(ser10) antibody (cyan). **G.** Proportions of CMZ cells in S-phase (magenta), G2/M-phase (cyan), or not proliferating (gray) of both siblings and *dnmt1*<sup>-/-</sup> larvae from 3-5 dpf. **H.** Proportion of CMZ cells labeled with BrdU from 3-5 dpf between controls and *dnmt1*<sup>-/-</sup> larvae. **I.** Proportion of CMZ cells labeled with pH3 from 3-5 dpf between controls and *dnmt1*<sup>-/-</sup> larvae. White dotted lines designate CMZ (**A-F**). Scale bars: 30 μm \**p* < 0.05, \*\**p* < 0.005, \*\*\**p* < 0.0005, \*\*\*\**p* < 0.00005. Dorsal is up in all images.

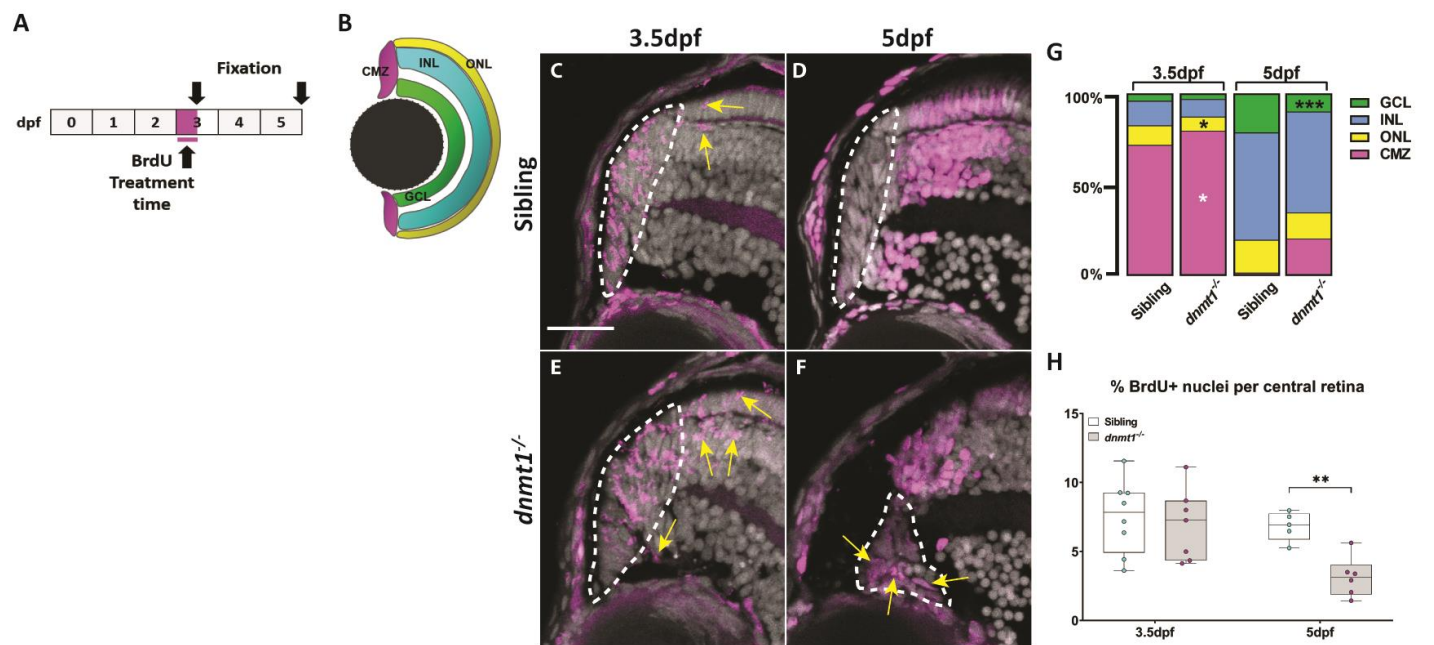

**Figure 6. Neurons produced by *dnmt1*<sup>-/-</sup> RSCs fail to integrate into the neural retina.** **A.** Experimental paradigm depicting BrdU incorporation from 3-3.5 dpf. Fixations occurred at 3.5 & 5 dpf. **B.** Diagram of the four retinal domains (CMZ, GCL, INL, and ONL) whose colors correlate with the data presented in G. **C-F.** Transverse sections of BrdU pulses from 3-3.5 dpf (C, E) and pulse-chase assay from 3-5 dpf (D, F) (Siblings: A-B; *dnmt1*<sup>-/-</sup> C-D). Nuclei labeled with DAPI (gray). Cells in S-phase indicated by BrdU incorporation (magenta). Mitotic cells are labeled by a pH3(ser10) antibody (cyan). **G.** Proportion of BrdU<sup>+</sup> cells located in each retinal layer at 3.5 dpf and 5 dpf of *dnmt1*<sup>-/-</sup> and control larvae. **H.** Proportion of total BrdU<sup>+</sup> cells within the central retina of the pulse-chase experiment. White dotted lines designate the CMZ (C-F). Yellow arrows = BrdU<sup>+</sup> nuclei outside the CMZ (C, E). Scale bars: 20 μm. \**p* < 0.05, \*\**p* < 0.005, \*\*\**p* < 0.0005. Dorsal is up in all images.

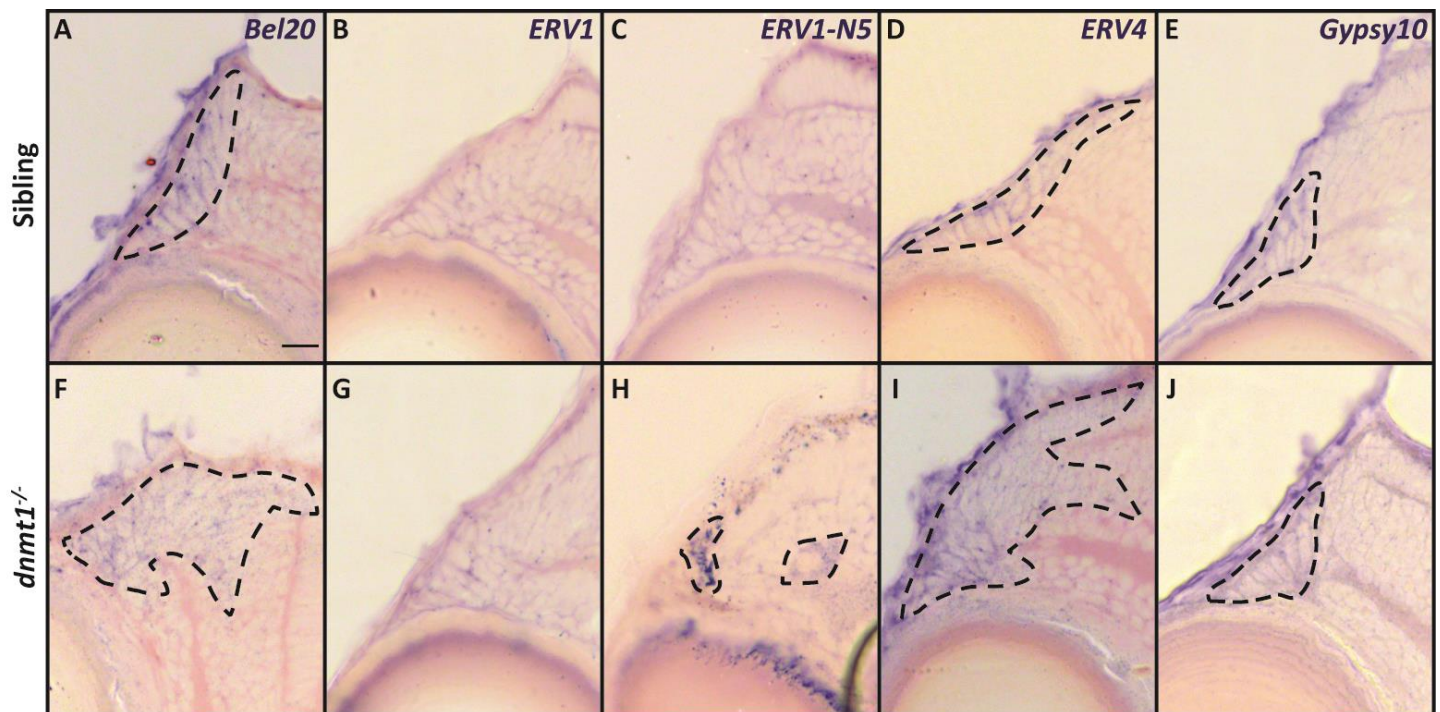

**Figure 7. Loss of *dnmt1* function results in misregulation of retroelement expression. A-J.** Transverse cryosections of sibling (A-E) and *dnmt1*<sup>-/-</sup> (F-J) larvae at 4dpf. **A, F.** Expression of *Bel20* LTR. **B, G.** Expression of *ERV1* LTR. **C, H.** Expression of *ERV1-N5* LTR. **D, I.** Expression of *ERV4* LTR. **E, J.** Expression of *Gypsy10* LTR. Dotted lines: domains of retroelement expression. Scale bars = 10 μm. Dorsal is up in all images.



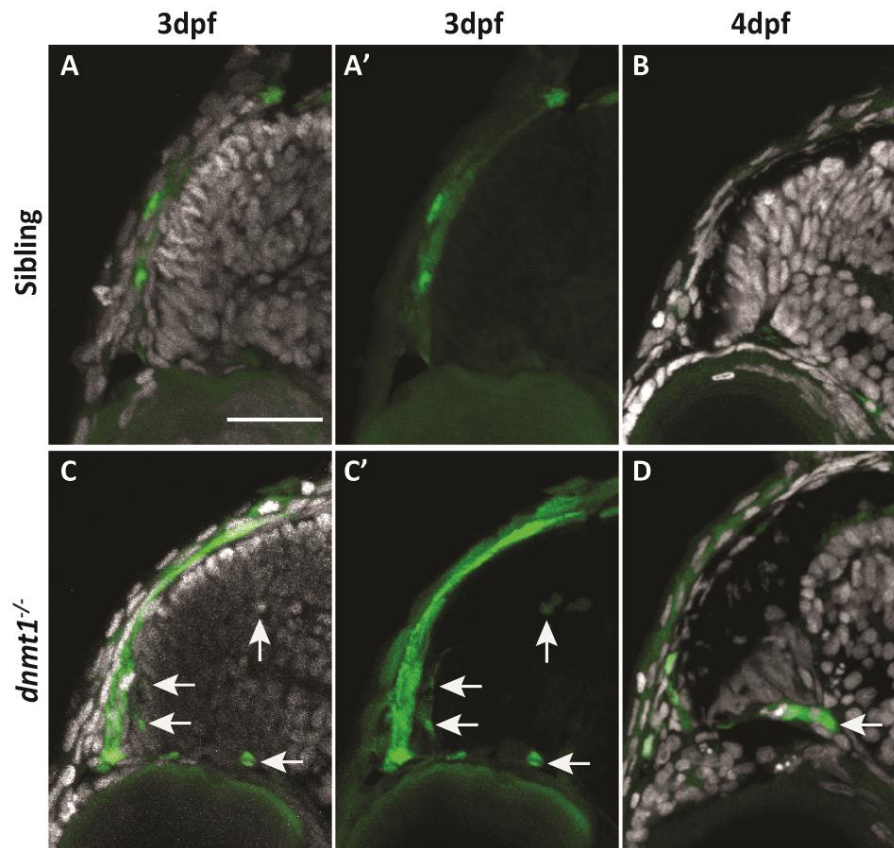

**Figure 8. RSCs require dnmt1 function to repress L1RE3-EGFP transposition. A-D.** Transverse sections of *Tg(CMV:Hsa.L1RE3,EGFP,myl7:EGFP;dnmt1<sup>+/+</sup>)* (**A-B**) and *Tg(CMV:Hsa.L1RE3,EGFP,myl7:EGFP;dnmt1<sup>-/-</sup>)* (**C-D**) larvae at 3dpf (**A, A', C, C'**) and 4dpf (**B, D**). Nuclei labeled with DAPI (gray). Endogenous EGFP expression activated after L1RE3-EGFP transposition labeled in green. Arrows delineate EGFP+ cells. Scale bars: 30  $\mu$ m. Dorsal is up in all images.
